# Supplementary material for: Homogeneous Chronic Subdural Hematoma with Diverse Recurrent Possibilities
Source: MDPI journal article supplement (doi:10.3390/diagnostics12112695), 2022-11-04
Supplement: s1 [file s1]

Supplemental Table S1. The characteristic among 4 types of CSDHS.

|                    | Trabecular    | Homogenous    | Laminar       | Separate      | P-value |
|--------------------|---------------|---------------|---------------|---------------|---------|
| Number             | 9             | 15            | 8             | 10            |         |
| Age                | 76.00 (13.50) | 75.00 (12.00) | 74.50 (8.50)  | 74.50 (13.75) | 0.990   |
| Gender             |               |               |               |               | 0.958   |
| Male               | 7 (77.78%)    | 12 (80.00%)   | 6 (75.00%)    | 7 (70.00%)    |         |
| Female             | 2 (22.22%)    | 3 (20.00%)    | 2 (25.00%)    | 3 (30.00%)    |         |
| Follow up duration | 51.00 (21.50) | 52.00 (19.00) | 47.50 (17.00) | 46.00 (17.50) | 0.794   |

Data are presented as median (IQR) or n (%).

Supplemental Table S2. The characteristic among 5 types of CSDHS.

|                    | Homogeneous LD | Trabecular    | Homogeneous HD | Laminar       | Separate      | P-value |
|--------------------|----------------|---------------|----------------|---------------|---------------|---------|
| Number             | 7              | 9             | 8              | 8             | 10            |         |
| Age                | 75.00 (18.00)  | 76.00 (13.50) | 74.50 (11.25)  | 74.50 (8.50)  | 74.50 (13.75) | 0.984   |
| Gender             |                |               |                |               |               | 0.952   |
| Male               | 5 (71.43%)     | 7 (77.78%)    | 7 (87.50%)     | 6 (75.00%)    | 7 (70.00%)    |         |
| Female             | 2 (28.57%)     | 2 (22.22%)    | 1 (12.50%)     | 2 (25.00%)    | 3 (30.00%)    |         |
| Follow up duration | 53.00 (29.00)  | 51.00 (21.50) | 51.00 (20.50)  | 47.50 (17.00) | 46.00 (17.50) | 0.904   |

Data are presented as median (IQR) or n (%).
